# Supplementary material for: A phosphorus modified mesoporous AuRh film as an efficient bifunctional electrocatalyst for urea-assisted energy-saving hydrogen production
Source: Royal Society of Chemistry journal article supplement (doi:10.1039/d1ta09061e), 2022-01-01
Supplement: d1ta09061e1.pdf [file d1ta09061e1.pdf]

Electronic Supplementary Information for

**A phosphorus modified mesoporous AuRh film as an efficient bifunctional electrocatalyst for urea-assisted energy-saving hydrogen production**

Mei Zhang, Zhongyao Duan, Lin Cui, Hongjie Yu, Ziqiang Wang, You Xu, Xiaonian Li, Liang

Wang and Hongjing Wang\*

State Key Laboratory Breeding Base of Green-Chemical Synthesis Technology, College of Chemical Engineering, Zhejiang University of Technology, Hangzhou 310014, P. R. China.

E-mail: [hjw@zjut.edu.cn](mailto:hjw@zjut.edu.cn)

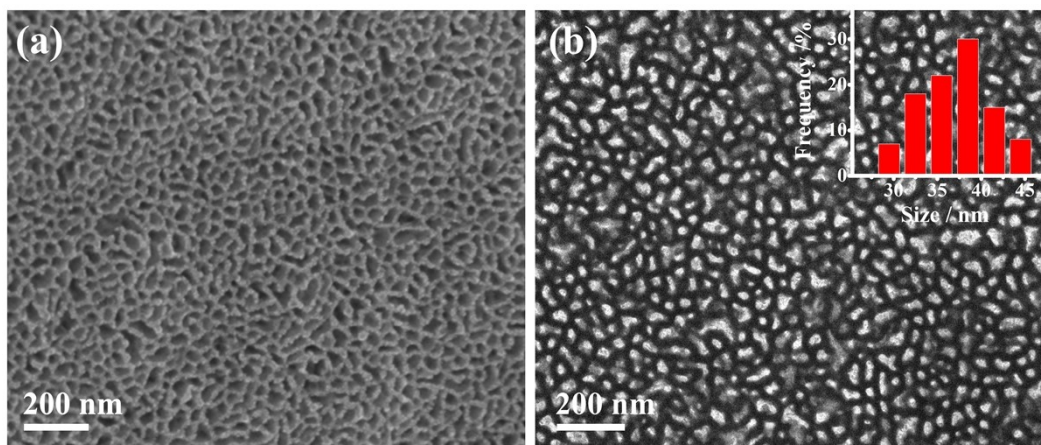

**Fig. S1** (a) SEM image of the mAuRh film/NF and (b) TEM image of the mAuRh film. The inset of (b) represents the pore-size distribution histogram of mAuRh film.

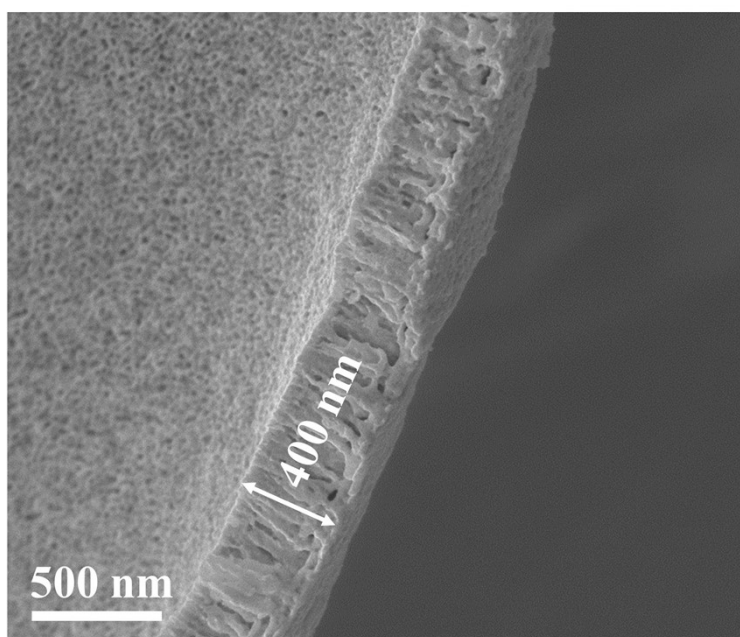

**Fig. S2** Cross-sectional SEM image of P-mAuRh film/NF.

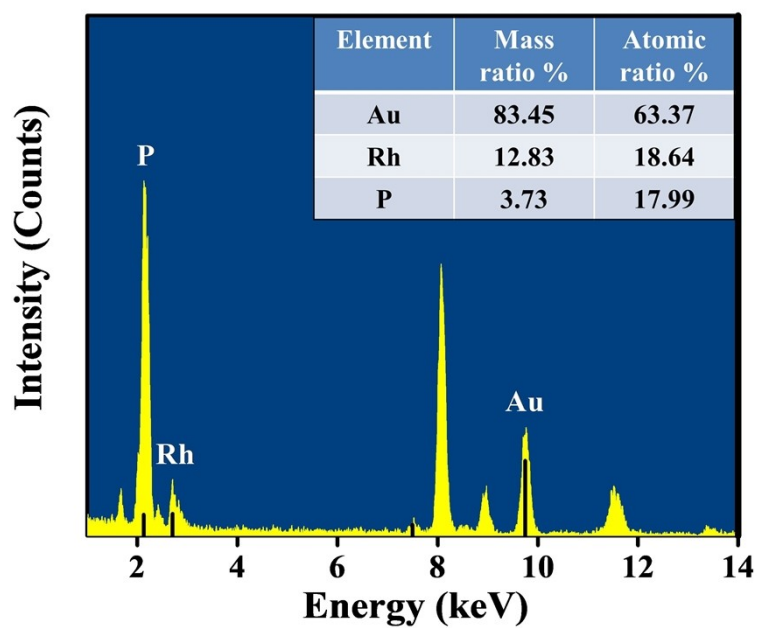

Fig. S3 EDX spectrum of P-mAuRh film.

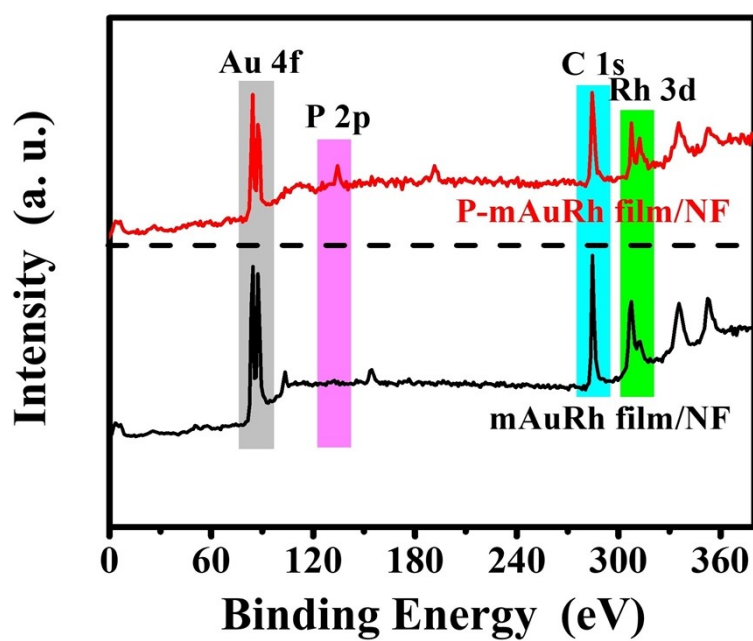

Fig. S4 XPS survey spectra of P-mAuRh film and mAuRh film.

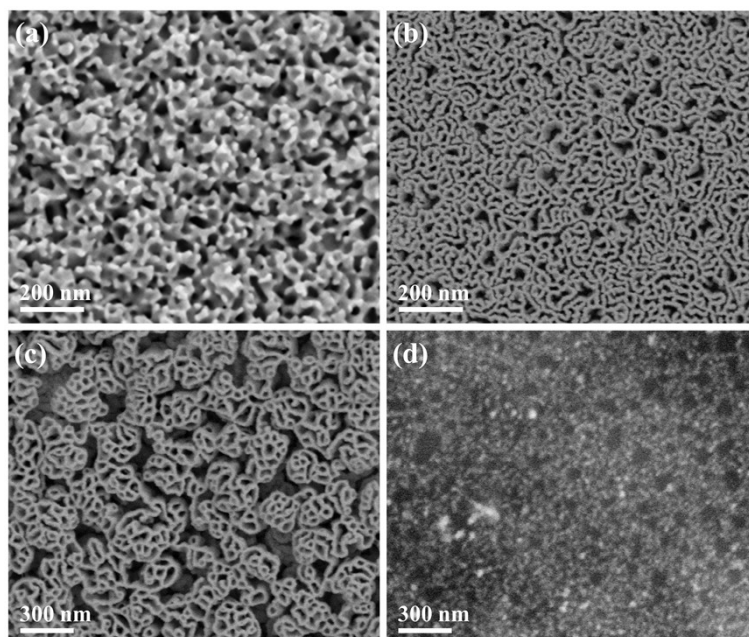

**Fig. S5** SEM images of mAuRh film/NF obtained with different molar ratios of metal precursors:

(a) Au<sub>4</sub>Rh<sub>0</sub>, (b) Au<sub>1</sub>Rh<sub>1</sub>, (c) Au<sub>1</sub>Rh<sub>3</sub> and (d) Au<sub>0</sub>Rh<sub>4</sub>.

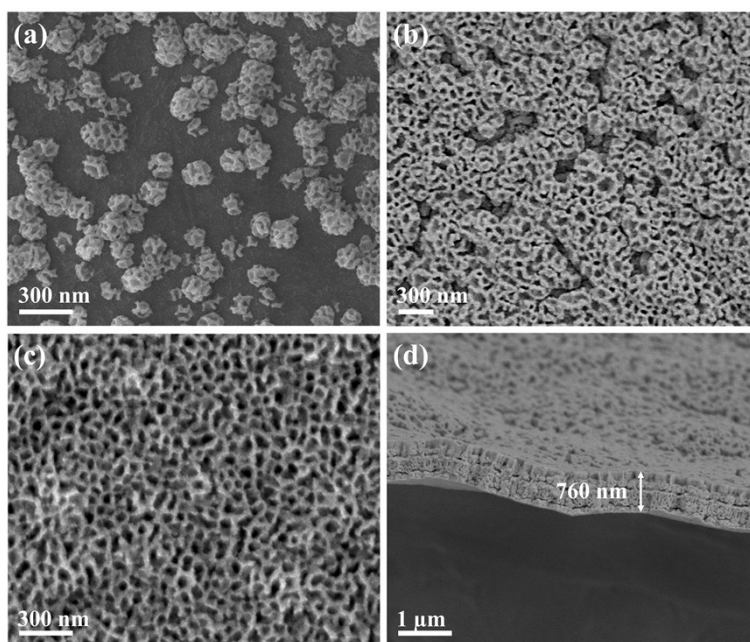

**Fig. S6** SEM images of mAuRh film/NF taken from different soaking times: (a) 20 min, (b) 60 min, (c) 180 min, respectively, and (d) the cross-section image of mAuRh film/NF taken from 180 min.

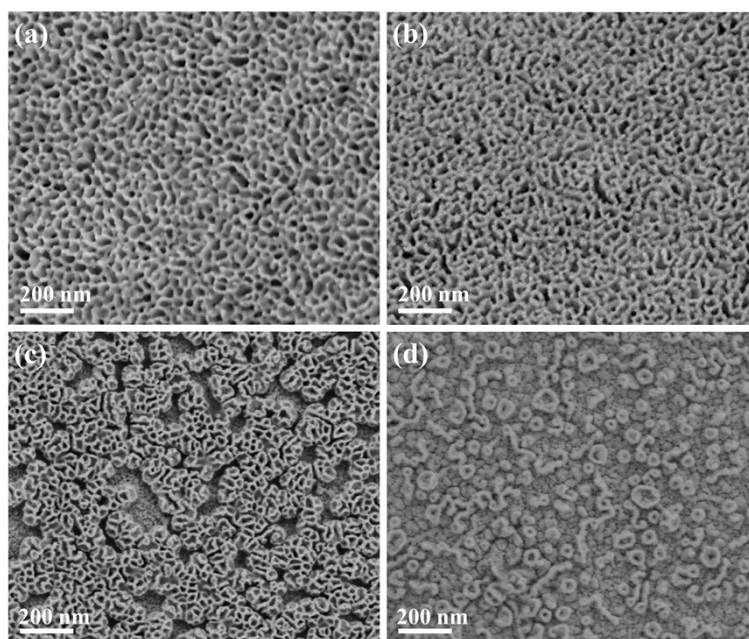

**Fig. S7** SEM images of P-mAuRh film/NF under different heating treatment times: (a) 3 h, (b) 4 h, (c) 6 h and (d) 8 h.

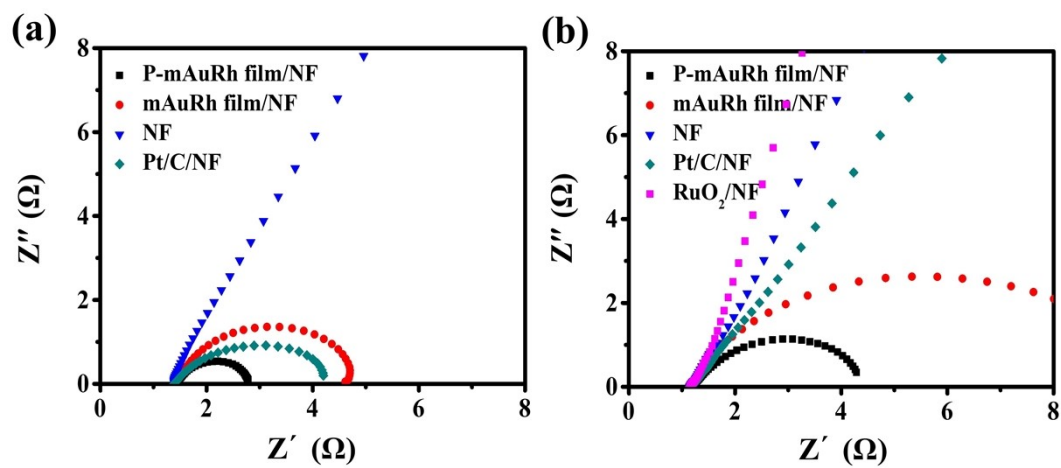

**Fig. S8** EIS curves of different catalysts for (a) HER at  $-0.12$  V (vs. RHE) and (b) UOR at  $1.35$  V (vs. RHE).

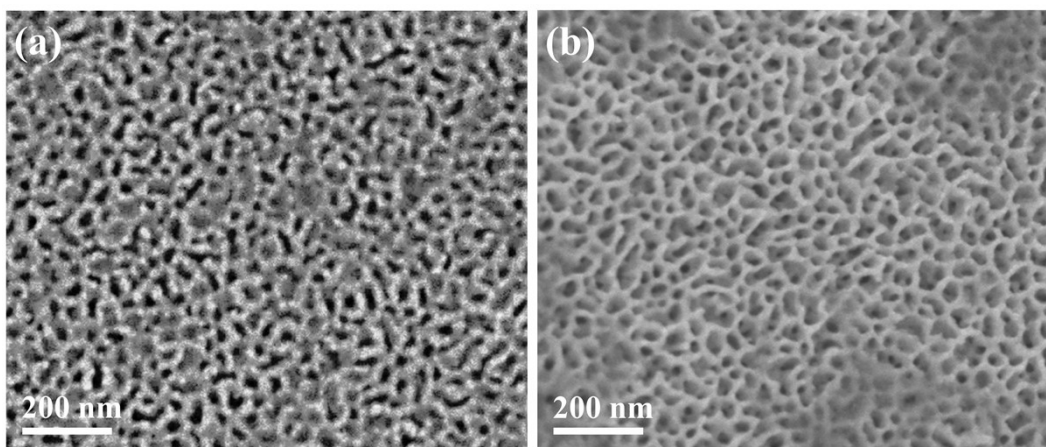

**Fig. S9** SEM images of P-mAuRh film/NF after long-term durability tests for (a) HER and (b) UOR.

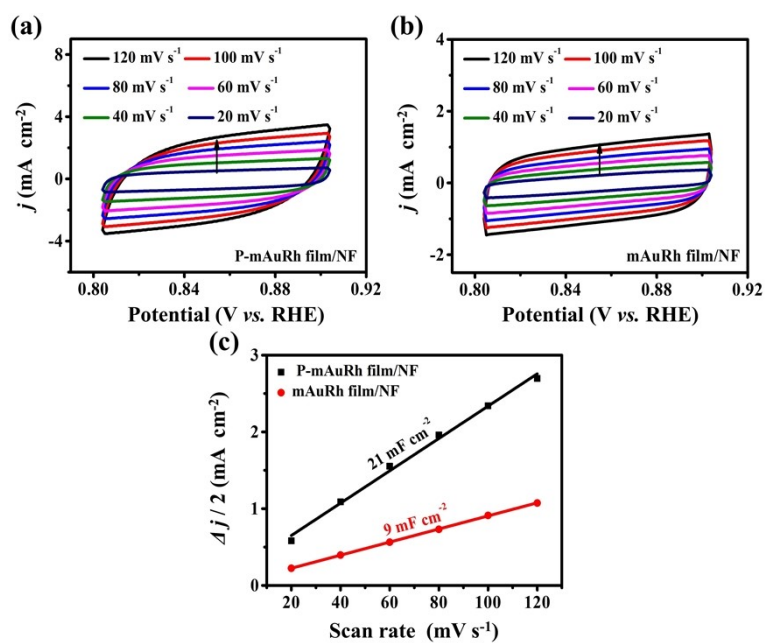

**Fig. S10** CV curves of (a) P-mAuRh film/NF, (b) mAuRh film/NF from 0.804 to 0.904 V (vs. RHE).

(c)  $C_{dl}$  curves of different catalysts at 0.854 V (vs. RHE) in 1.0 M KOH solution.

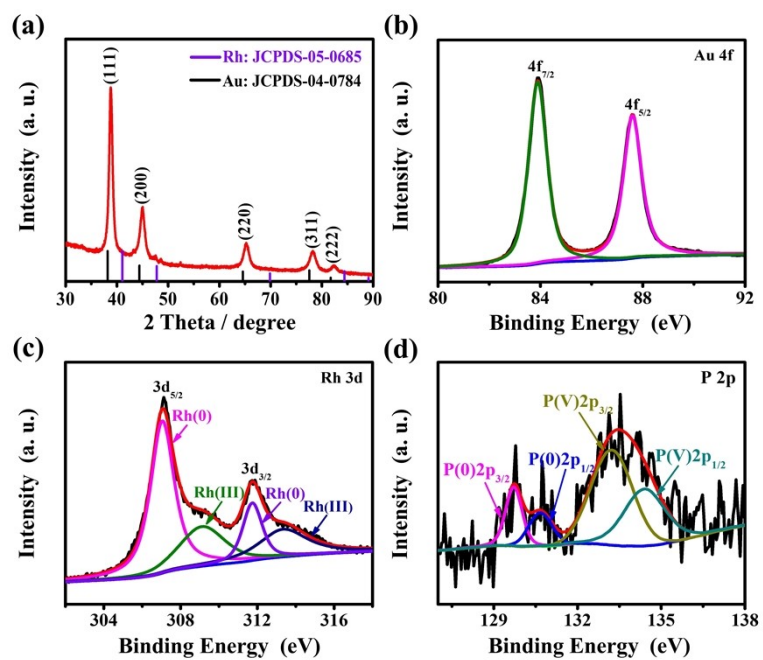

**Fig. S11** (a) XRD pattern, (b) Au 4f, (c) Rh 3d and (d) P 2p XPS spectra of P-mAuRh film/NF after long-term durability test for UOR.

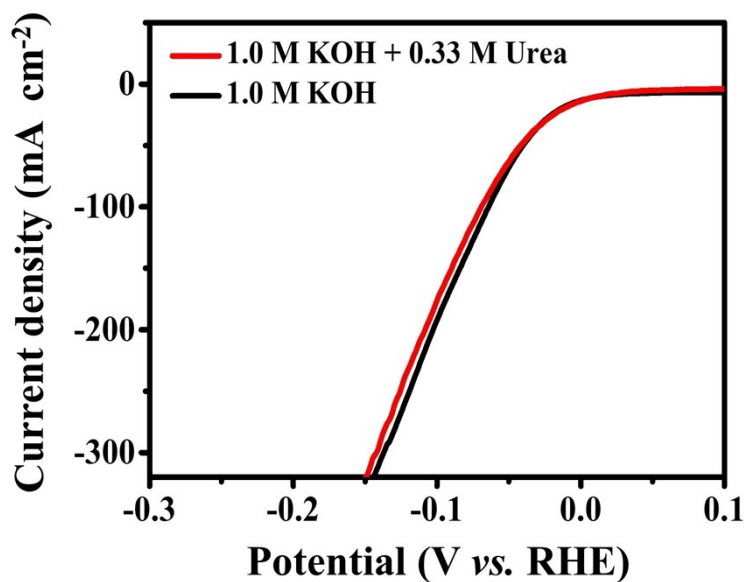

**Fig. S12** LSV curves of P-mAuRh film/NF in 1.0 M KOH with and without 0.33 M urea for HER.

**Table S1** HER performance comparison between the P-mAuRh film/NF and some other reported electrocatalysts.

| Electrocatalysts                          | Electrolytes     | substrate | Current density (mA cm <sup>-2</sup> ) | Overpotential (mV vs. RHE) | Ref.             |
|-------------------------------------------|------------------|-----------|----------------------------------------|----------------------------|------------------|
| <b>P-mAuRh film/NF</b>                    | <b>1.0 M KOH</b> | <b>NF</b> | <b>50</b>                              | <b>45</b>                  | <b>This work</b> |
|                                           |                  |           | <b>100</b>                             | <b>73</b>                  |                  |
| Co-NCNTFs/NF                              | 1.0 M KOH        | NF        | 10                                     | 141                        | [1]              |
| Ni <sub>2</sub> P-UNMs/NF                 | 1.0 M KOH        | NF        | 10                                     | 75                         | [2]              |
| Mo/Mn-Ni <sub>x</sub> S <sub>y</sub> /NF  | 1.0 M KOH        | NF        | 10                                     | 144                        | [3]              |
| Ni <sub>1.8</sub> Cu <sub>0.2</sub> -P/NF | 1.0 M KOH        | NF        | 10                                     | 78                         | [4]              |
| Co-NT/NF                                  | 1.0 M KOH        | NF        | 10                                     | 178                        | [5]              |
| Mn-doped NiS <sub>2</sub> /NF             | 1.0 M KOH        | NF        | 10                                     | 71                         | [6]              |
| NiSe/NF                                   | 1.0 M KOH        | NF        | 10                                     | 96                         | [7]              |
| N-NiS/MoS <sub>2</sub> -NF                | 1.0 M KOH        | NF        | 10                                     | 71                         | [8]              |
| NiCoP-CoP/NF                              | 1.0 M KOH        | NF        | 10                                     | 73                         | [9]              |
| Ni <sub>x</sub> P-400                     | 1.0 M KOH        | NF        | 10                                     | 71                         | [10]             |



**Table S2** UOR performance comparison between the P-mAuRh film/NF and some other reported electrocatalysts.

| Electrocatalysts                                                   | Electrolytes              | substrate | Current density (mA cm <sup>-2</sup> ) | Potential (V vs. RHE) | Ref.      |
|--------------------------------------------------------------------|---------------------------|-----------|----------------------------------------|-----------------------|-----------|
| P-mAuRh film/NF                                                    | 1.0 M KOH/<br>0.33 M urea | NF        | 50                                     | 1.35                  | This work |
|                                                                    |                           |           | 100                                    | 1.358                 |           |
| MoS <sub>2</sub> /Ni <sub>3</sub> S <sub>2</sub> /NF               | 1.0 M KOH/<br>0.33 M urea | NF        | 200                                    | 1.35                  | [11]      |
| $\alpha$ - Ni(OH) <sub>2</sub> /NF                                 | 1.0 M KOH/<br>0.33 M urea | NF        | 10                                     | 1.44                  | [12]      |
|                                                                    |                           |           | 100                                    | 1.73                  |           |
| NiCo <sub>2</sub> S <sub>4</sub> NS/CC                             | 1.0 M KOH/<br>0.33 M urea | CC        | 10                                     | 1.45                  | [13]      |
| Ni/C-1                                                             | 1.0 M KOH/<br>0.33 M urea | -         | 10                                     | 1.36                  | [14]      |
| Ni <sub>(10%)</sub> Pd <sub>(10%)</sub> /OMC                       | 1.0 M KOH/<br>0.33 M urea | OMC       | 30                                     | 1.346                 | [15]      |
| Ni(OH) <sub>2</sub> //F-Ni <sub>3</sub> S <sub>2</sub> /NF (NF-20) | 1.0 M KOH/<br>0.33 M urea | NF        | 50                                     | 1.36                  | [16]      |
| Fe doped $\alpha$ -Ni(OH) <sub>2</sub> /NF                         | 1.0 M KOH/<br>0.33 M urea | NF        | 100                                    | 1.408                 | [17]      |
| Ni(OH) <sub>2</sub> NS@NW/NF                                       | 1.0 M KOH/<br>0.33 M urea | NF        | 10                                     | 1.408                 | [18]      |
| Ni-Co <sub>9</sub> S <sub>8</sub> /CC                              | 1.0 M KOH/<br>0.33 M urea | CC        | 100                                    | 1.43                  | [19]      |
| Ni <sub>1.5</sub> Mn <sub>1.5</sub> O <sub>4</sub>                 | 1.0 M KOH/<br>0.33 M urea | -         | 6.9                                    | 1.338                 | [20]      |
| Ni MOF                                                             | 1.0 M KOH/<br>0.33 M urea | -         | 10                                     | 1.36                  | [21]      |

**Table S3.** The overall urea-assisted water splitting performance comparison between the P-mAuRh film/NF and some other reported electrocatalysts.

| Electrocatalysts                                           |                                                            | Electrolytes              | Current density (mA cm <sup>-2</sup> ) | Voltage (V) | Ref.      |
|------------------------------------------------------------|------------------------------------------------------------|---------------------------|----------------------------------------|-------------|-----------|
| Anode                                                      | Cathode                                                    |                           |                                        |             |           |
| P-mAuRh film/NF                                            | P-mAuRh film/NF                                            | 1.0 M KOH/<br>0.33 M urea | 10                                     | 1.33        | This work |
|                                                            |                                                            |                           | 50                                     | 1.415       |           |
|                                                            |                                                            |                           | 100                                    | 1.47        |           |
| MoS <sub>2</sub> /Ni <sub>3</sub> S <sub>2</sub> /NF       | MoS <sub>2</sub> /Ni <sub>3</sub> S <sub>2</sub> /NF       | 1.0 M KOH/<br>0.33 M urea | 20                                     | 1.45        | [11]      |
| NiCo <sub>2</sub> S <sub>4</sub> NS/CC                     | NiCo <sub>2</sub> S <sub>4</sub> NS/CC                     | 1.0 M KOH/<br>0.33 M urea | 10                                     | 1.45        | [13]      |
| Ni/C-1/CC                                                  | Ni/C-1/CC                                                  | 1.0 M KOH/<br>0.33 M urea | 10                                     | 1.6         | [14]      |
| Ni <sub>(10%)</sub> Pd <sub>(10%)</sub> /OMC               | Ni <sub>(10%)</sub> Pd <sub>(10%)</sub> /OMC               | 1.0 M KOH/<br>0.33 M urea | 30                                     | 1.35        | [15]      |
| Ni(OH) <sub>2</sub> NS@NW/NF                               | Co <sub>2</sub> P NW/NF                                    | 1.0 M KOH/<br>0.33 M urea | 5                                      | 1.58        | [18]      |
| Ni-Co <sub>9</sub> S <sub>8</sub> /CC                      | Ni-Co <sub>9</sub> S <sub>8</sub> /CC                      | 1.0 M KOH/<br>0.33 M urea | 10                                     | 1.52        | [19]      |
| NiSe <sub>2</sub> -NiO                                     | commercial Pt/C                                            | 1.0 M KOH/<br>0.33 M urea | 10                                     | 1.39        | [22]      |
| MoS <sub>2</sub> /Ni <sub>3</sub> S <sub>2</sub> /NiFe-LDH | MoS <sub>2</sub> /Ni <sub>3</sub> S <sub>2</sub> /NiFe-LDH | 1.0 M KOH/<br>0.5 M urea  | 50                                     | 1.343       | [23]      |
| Ni-MOF-0.5                                                 | Ni-MOF-0.5                                                 | 1.0 M KOH/<br>0.5 M urea  | 10                                     | 1.52        | [24]      |
| Ni <sub>3</sub> N-350/NF                                   | Ni <sub>3</sub> N-350/NF                                   | 1.0 M KOH/<br>0.5 M urea  | 100                                    | 1.51        | [25]      |

## References

- [1] Q. Yuan, Y. Yu, Y. Gong and X. Bi, *ACS Appl. Mater. Interfaces*, 2020, **12**, 3592-3602.
- [2] Y. Ding, B. Q. Miao, S. N. Li, Y. C. Jiang, Y. Y. Liu, H. C. Yao and Y. Chen, *Appl. Catal. B: Environ.*, 2020, **268**, 118393.
- [3] Y. Gong, Y. Zhi, Y. Lin, T. Zhou, J. Li, F. Jiao and W. Wang, *Dalton Trans.*, 2019, **48**, 6718-6729.
- [4] S. Chu, W. Chen, G. Chen, J. Huang, R. Zhang, C. Song, X. Wang, C. Li and K. Ostrikov, *Appl. Catal. B: Environ.*, 2019, **243**, 537-545.
- [5] J. Zhang, M. Song, J. Wang, Z. Wu and X. Liu, *J. Colloid Interface Sci.*, 2020, **559**, 105-114.
- [6] L. Zeng, Z. Liu, K. Sun, Y. Chen, J. Zhao, Y. Chen, Y. Pan, Y. Lu, Y. Liu and C. Liu, *J. Mater. Chem. A*, 2019, **7**, 25628-25640.
- [7] C. Tang, N. Cheng, Z. Pu, W. Xing, X. Sun, *Angew. Chem., Int. Ed.* 2015, **54**, 9351-9355.
- [8] J. Yu, Q. He, G. Yang, W. Zhou, Z. Shao, M. Ni, *ACS Catal.*, 2019, **9**, 9973-10011.
- [9] H. Liu, X. Ma, H. Hu, Y. Pan, W. Zhao, J. Liu, X. Zhao, J. Wang, Z. Yang, Q. Zhao, H. Ning, M. Wu, *ACS Appl. Mater. Interfaces*, 2019, **11**, 15528-15536.
- [10] Y. Wang, L. Liu, X. Zhang, F. Yan, C. Zhu, Y. Chen, *J. Mater. Chem. A*, 2019, **7**, 22412-22419.
- [11] F. Li, J. Chen, D. Zhang, W.F. Fu, Y. Chen, Z. Wen, X.J. Lv, *Chem. Commun.*, 2018, **54**, 5181-5184.
- [12] J. Xie, W. Liu, X. Zhang, Y. Guo, L. Gao, F. Lei, B. Tang, Y. Xie, *ACS Materials Lett.*, 2019, **1**, 103-110.
- [13] W. Zhu, M. Ren, N. Hu, W. Zhang, Z. Luo, R. Wang, J. Wang, L. Huang, Y. Suo, J. Wang, *ACS Sustainable Chem. Eng.*, 2018, **6**, 5011-5020.
- [14] L. Wang, L. Ren, X. Wang, X. Feng, J. Zhou, B. Wang, *ACS Appl. Mater. Interfaces*, 2018, **10**,

4750-4756.

- [15] N. Muthuchamy, S. Jang, J.C. Park, S. Park, K.H. Park, *ACS Sustainable Chem. Eng.*, 2019, **7**, 15526-15536.
- [16] P. Hao, W. Zhu, F. Lei, X. Ma, J. Xie, H. Tan, L. Li, H. Liu, B. Tang, *Nanoscale*, 2018, **10**, 20384-20392.
- [17] J. Xie, W. Liu, F. Lei, X. Zhang, H. Qu, L. Gao, P. Hao, B. Tang, Y. Xie, *Chem.–Eur. J.*, 2018, **24**, 18408-18412.
- [18] Z. Yue, S. Yao, Y. Li, W. Zhu, W. Zhang, R. Wang, J. Wang, L. Huang, D. Zhao, J. Wang, *Electrochim. Acta*, 2018, **268**, 211-217.
- [19] P. Hao, W. Zhu, L. Li, J. Tian, J. Xie, F. Lei, G. Cui, Y. Zhang, B. Tang, *Electrochim. Acta*, 2020, **338**, 135883.
- [20] S. Periyasamy, P. Subramanian, E. Levi, D. Aurbach, A. Gedanken, A. Schechter, *ACS Appl. Mater. Interfaces*, 2016, **8**, 12176-12185.
- [21] D. Zhu, C. Guo, J. Liu, L. Wang, Y. Du, S.Z. Qiao, *Chem. Commun.*, 2017, **53**, 10906-10909.
- [22] Z. Liu, C. Zhang, H. Liu, L. Feng, *Appl. Catal. B: Environ.*, 2020, **276**, 119165.
- [23] M. He, S. Hu, C. Feng, H. Wu, H. Liu, H. Mei, *Int. J. Hydrogen Energy*, 2020, **45**, 23-35.
- [24] S. Zheng, Y. Zheng, H. Xue, H. Pang, *Chem. Eng. J.*, 2020, **395**, 125166.
- [25] Z. Zhao, J. Zhao, H. Wang, X. Li, L. Yang, Z. Zhao, X. Liu, Y. Liu, P. Liu, Z. Cai, *Int. J. Hydrogen Energy*, 2020, **45**, 14199-14207.
